# Supplementary material for: Mendelian randomization analyses of genetically predicted circulating levels of cytokines with risk of breast cancer
Source: PubMed Central journal article supplement (PMC7462857; doi:10.1038/s41698-020-00131-6), 2020-09-01
Supplement: 41698_2020_131_MOESM1_ESM.pdf [file 41698_2020_131_MOESM1_ESM.pdf]

**Supplementary table 1 Characteristics of the genetic instruments for the cytokines in the Mendelian randomization study**

| Cytokines | SNPs (N) | Variance explained (R <sup>2</sup> ) | F-statistic<br>[range] | Total samples |       | Oncoarray |       | iCOGS  |       | GWAS   |       | ER Positive |       | ER Negative |       |
|-----------|----------|--------------------------------------|------------------------|---------------|-------|-----------|-------|--------|-------|--------|-------|-------------|-------|-------------|-------|
|           |          |                                      |                        | Beta          | Se    | Beta      | Se    | Beta   | Se    | Beta   | Se    | Beta        | Se    | Beta        | Se    |
| bNGF      | 1        | 0.010                                | 34                     | 0.014         | 0.044 | -0.014    | 0.064 | 0.019  | 0.069 | 0.103  | 0.125 | 0.024       | 0.052 | -0.089      | 0.081 |
| CTACK     | 6        | 0.088                                | 30-75                  | -0.004        | 0.015 | -0.007    | 0.022 | 0.007  | 0.026 | -0.025 | 0.043 | 0           | 0.018 | -0.011      | 0.028 |
| Eotaxin   | 9        | 0.042                                | 31-61                  | 0.054         | 0.023 | 0.062     | 0.032 | 0.03   | 0.05  | 0.097  | 0.068 | 0.054       | 0.027 | 0.07        | 0.047 |
| GROa      | 8        | 0.143                                | 30-115                 | 0.029         | 0.013 | 0.019     | 0.025 | 0.053  | 0.02  | -0.006 | 0.035 | 0.038       | 0.014 | 0.04        | 0.028 |
| HGF       | 2        | 0.013                                | 32-34                  | 0.022         | 0.04  | 0.038     | 0.056 | 0.023  | 0.064 | -0.048 | 0.117 | 0.01        | 0.047 | 0.116       | 0.073 |
| IL12p70   | 12       | 0.060                                | 32-55                  | 0.033         | 0.028 | 0.039     | 0.039 | 0.027  | 0.04  | 0.03   | 0.054 | 0.013       | 0.032 | 0.079       | 0.038 |
| IL13      | 5        | 0.100                                | 32-211                 | 0.061         | 0.017 | 0.063     | 0.033 | 0.057  | 0.031 | 0.061  | 0.041 | 0.045       | 0.02  | 0.08        | 0.03  |
| IL16      | 4        | 0.083                                | 30-60                  | 0.019         | 0.017 | 0.026     | 0.033 | -0.013 | 0.029 | 0.068  | 0.046 | 0.015       | 0.02  | 0.074       | 0.031 |
| IL17      | 1        | 0.004                                | 31                     | 0.048         | 0.073 | 0.157     | 0.098 | -0.106 | 0.132 | -0.041 | 0.191 | 0.043       | 0.087 | 0.115       | 0.129 |
| IL18      | 10       | 0.101                                | 31-45                  | 0.02          | 0.019 | -0.008    | 0.024 | 0.05   | 0.025 | 0.043  | 0.045 | 0.03        | 0.022 | 0.037       | 0.028 |
| IL2ra     | 3        | 0.039                                | 32-45                  | 0.051         | 0.023 | 0.076     | 0.038 | 0.025  | 0.035 | 0.047  | 0.064 | 0.069       | 0.027 | 0.024       | 0.041 |
| IP10      | 2        | 0.020                                | 31-32                  | 0.028         | 0.034 | 0         | 0.047 | 0.095  | 0.057 | -0.059 | 0.104 | 0.005       | 0.041 | 0.041       | 0.062 |
| MCP1      | 10       | 0.047                                | 30-66                  | 0.075         | 0.021 | 0.104     | 0.04  | 0.018  | 0.033 | 0.143  | 0.062 | 0.075       | 0.025 | 0.046       | 0.049 |
| MCSF      | 1        | 0.017                                | 32                     | -0.027        | 0.036 | -0.042    | 0.05  | 0.017  | 0.061 | -0.081 | 0.099 | -0.014      | 0.043 | -0.114      | 0.065 |
| MIF       | 1        | 0.012                                | 39                     | -0.127        | 0.041 | -0.171    | 0.059 | -0.065 | 0.065 | -0.152 | 0.116 | -0.089      | 0.049 | -0.178      | 0.075 |
| MIG       | 1        | 0.008                                | 34                     | 0.058         | 0.05  | 0.008     | 0.072 | 0.134  | 0.08  | 0.005  | 0.149 | 0.117       | 0.06  | -0.058      | 0.094 |
| MIP1b     | 88       | 0.756                                | 30-636                 | 0.021         | 0.007 | 0.025     | 0.009 | 0.012  | 0.009 | 0.033  | 0.016 | 0.02        | 0.008 | 0.037       | 0.011 |
| PDGFbb    | 13       | 0.069                                | 30-77                  | 0.017         | 0.018 | 0.021     | 0.026 | 0.008  | 0.041 | 0.031  | 0.053 | 0.022       | 0.024 | 0.027       | 0.043 |
| RANTES    | 1        | 0.007                                | 30                     | -0.079        | 0.054 | -0.094    | 0.08  | 0.02   | 0.084 | -0.35  | 0.152 | -0.125      | 0.065 | -0.051      | 0.099 |
| SCF       | 1        | 0.004                                | 31                     | 0.135         | 0.066 | 0.062     | 0.097 | 0.256  | 0.106 | 0.024  | 0.188 | 0.19        | 0.079 | 0.036       | 0.121 |
| SCGFb     | 5        | 0.063                                | 34-63                  | 0.032         | 0.035 | 0.036     | 0.035 | -0.006 | 0.035 | 0.186  | 0.062 | 0.011       | 0.036 | 0.066       | 0.034 |
| TNFB      | 2        | 0.095                                | 35-80                  | 0.019         | 0.017 | 0.032     | 0.022 | 0.007  | 0.029 | -0.017 | 0.051 | 0.024       | 0.02  | -0.012      | 0.03  |

|       |    |       |        |        |       |        |       |       |       |        |       |        |       |        |       |
|-------|----|-------|--------|--------|-------|--------|-------|-------|-------|--------|-------|--------|-------|--------|-------|
| TRAIL | 26 | 0.292 | 30-352 | -0.007 | 0.012 | -0.007 | 0.014 | 0.006 | 0.016 | -0.043 | 0.033 | -0.015 | 0.013 | -0.007 | 0.019 |
| VEGF  | 17 | 0.092 | 29-53  | 0.018  | 0.017 | 0.012  | 0.032 | 0.027 | 0.027 | 0.018  | 0.045 | 0.004  | 0.02  | 0.061  | 0.03  |

R<sup>2</sup> represents the proportion of variance in a risk factor explained by the genetic instrument. F-statistic represents the strength of the association between the genetic instrument and levels of the risk factor.

**Supplementary table 2 Cytokines examined by the original GWAS study and number of genetic instruments (SNPs) identified from our approach.**

| <b>Cytokines</b> | <b>Total N</b> | <b>SNPs (N)</b> |
|------------------|----------------|-----------------|
| bNGF             | 3531           | 1               |
| CTACK            | 3631           | 6               |
| Eotaxin          | 8153           | 9               |
| FGFBasic         | 7565           | 0               |
| GCSF             | 7904           | 0               |
| GROa             | 3505           | 8               |
| HGF              | 8292           | 2               |
| IFNg             | 7701           | 0               |
| IL-10            | 7681           | 0               |
| IL-12p70         | 8270           | 12              |
| IL-13            | 3557           | 5               |
| IL-16            | 3483           | 4               |
| IL-17            | 7760           | 1               |
| IL-18            | 3636           | 10              |
| IL-1b            | 3309           | 0               |
| IL1ra            | 3638           | 0               |
| IL-2             | 3475           | 0               |
| IL2ra            | 3677           | 3               |
| IL-4             | 8124           | 0               |
| IL-5             | 3364           | 0               |
| IL-6             | 8189           | 0               |
| IL-7             | 3409           | 0               |
| IL-8             | 3526           | 0               |
| IL-9             | 3634           | 0               |
| IP10             | 3685           | 0               |
| MCP1             | 8293           | 10              |
| MCP3             | 843            | 0               |
| MCSF             | 840            | 1               |
| MIF              | 3494           | 1               |
| MIG              | 3685           | 1               |
| MIP1a            | 3522           | 0               |
| MIP1b            | 8243           | 88              |
| PDGFbb           | 8293           | 13              |
| RANTES           | 3421           | 1               |
| SCF              | 8290           | 1               |
| SCGFb            | 3682           | 5               |
| SDF1a            | 5998           | 0               |
| TNFa             | 3454           | 0               |
| TNFb             | 1559           | 2               |
| TRAIL            | 8186           | 26              |

|      |      |    |
|------|------|----|
| VEGF | 7118 | 17 |
|------|------|----|

**Supplementary table 3 SNPs that were used as instruments for breast cancer**

| SNP         | effect_allele | other_allele | beta    | se     | pval     |
|-------------|---------------|--------------|---------|--------|----------|
| rs10022462  | T             | C            | 0.0375  | 0.0062 | 1.55E-09 |
| rs10054203  | C             | G            | 0.0383  | 0.0065 | 3.21E-09 |
| rs10096351  | G             | A            | 0.1055  | 0.0062 | 1.97E-64 |
| rs10623258  | CTT           | C            | 0.0354  | 0.0063 | 2.26E-08 |
| rs10760444  | A             | G            | -0.0358 | 0.0062 | 9.06E-09 |
| rs10885405  | T             | C            | 0.0465  | 0.0062 | 5.44E-14 |
| rs10941679  | G             | A            | 0.1278  | 0.0071 | 5.61E-73 |
| rs10978911  | C             | G            | 0.0839  | 0.0091 | 2.36E-20 |
| rs10995201  | G             | A            | -0.1317 | 0.0087 | 1.56E-51 |
| rs11117758  | A             | G            | -0.0449 | 0.0076 | 3.90E-09 |
| rs11135046  | T             | G            | -0.0717 | 0.0062 | 4.68E-31 |
| rs11205303  | C             | T            | 0.0497  | 0.0064 | 1.14E-14 |
| rs1121948   | G             | A            | 0.0575  | 0.0077 | 7.48E-14 |
| rs11249433  | G             | A            | 0.0988  | 0.0065 | 1.76E-52 |
| rs11462858  | GT            | G            | -0.0471 | 0.0067 | 2.09E-12 |
| rs11571833  | T             | A            | 0.2727  | 0.0346 | 3.10E-15 |
| rs11583393  | A             | C            | -0.0396 | 0.0072 | 3.61E-08 |
| rs11624333  | C             | T            | -0.0968 | 0.0071 | 6.50E-42 |
| rs11672660  | T             | C            | 0.0472  | 0.008  | 4.13E-09 |
| rs11684853  | T             | G            | -0.0442 | 0.0062 | 1.12E-12 |
| rs117618124 | C             | T            | -0.1074 | 0.0156 | 5.46E-12 |
| rs117737783 | A             | G            | 0.0747  | 0.0127 | 4.03E-09 |
| rs11822830  | G             | A            | 0.0483  | 0.0063 | 1.98E-14 |
| rs11903787  | A             | G            | -0.0451 | 0.0076 | 2.36E-09 |
| rs11977670  | A             | G            | 0.0522  | 0.0063 | 1.05E-16 |
| rs12207986  | A             | G            | 0.0375  | 0.0062 | 1.45E-09 |
| rs12250948  | C             | T            | -0.0576 | 0.0074 | 1.04E-14 |
| rs1230666   | G             | A            | -0.0592 | 0.0095 | 3.87E-10 |
| rs12479355  | G             | A            | -0.0426 | 0.0076 | 2.36E-08 |
| rs12487185  | G             | A            | 0.045   | 0.0066 | 1.21E-11 |
| rs12513872  | A             | G            | 0.0413  | 0.0073 | 1.46E-08 |
| rs12519859  | A             | G            | 0.0365  | 0.0063 | 5.77E-09 |
| rs12546444  | T             | A            | -0.0717 | 0.011  | 7.45E-11 |
| rs1268974   | G             | A            | -0.0793 | 0.0063 | 3.71E-36 |
| rs12990503  | G             | C            | -0.073  | 0.007  | 9.99E-26 |
| rs13066793  | G             | A            | -0.0685 | 0.0112 | 1.04E-09 |
| rs13267382  | G             | A            | -0.0437 | 0.0065 | 1.60E-11 |
| rs1498608   | A             | T            | -0.0671 | 0.0107 | 3.48E-10 |
| rs150658557 | TA            | T            | -0.0605 | 0.0083 | 2.30E-13 |
| rs1685191   | T             | C            | -0.0586 | 0.0064 | 3.87E-20 |
| rs16991615  | A             | G            | 0.0758  | 0.0126 | 1.92E-09 |
| rs1707302   | G             | A            | 0.0364  | 0.0066 | 2.95E-08 |

|            |    |   |         |        |           |
|------------|----|---|---------|--------|-----------|
| rs170801   | A  | C | -0.0591 | 0.007  | 3.18E-17  |
| rs17156577 | C  | T | 0.0578  | 0.0098 | 4.25E-09  |
| rs17185310 | A  | G | 0.0395  | 0.0069 | 8.70E-09  |
| rs17268829 | C  | T | 0.0495  | 0.0068 | 4.49E-13  |
| rs17426269 | A  | G | 0.0487  | 0.0086 | 1.74E-08  |
| rs1778523  | G  | C | -0.0384 | 0.0066 | 7.55E-09  |
| rs1973765  | C  | T | -0.0817 | 0.0064 | 9.71E-38  |
| rs1985742  | T  | A | 0.0588  | 0.0065 | 8.10E-20  |
| rs2016394  | A  | G | -0.0425 | 0.0062 | 6.23E-12  |
| rs2253012  | T  | C | 0.0433  | 0.0065 | 3.13E-11  |
| rs2403907  | A  | C | -0.0796 | 0.0067 | 1.87E-32  |
| rs2432539  | G  | A | -0.0349 | 0.0064 | 4.02E-08  |
| rs2506889  | T  | C | -0.0615 | 0.0067 | 2.38E-20  |
| rs2747652  | C  | T | 0.0663  | 0.0062 | 1.31E-26  |
| rs2787486  | C  | A | -0.0758 | 0.0068 | 5.56E-29  |
| rs28512361 | A  | G | 0.0611  | 0.0109 | 2.25E-08  |
| rs2853669  | G  | A | -0.0651 | 0.0069 | 4.05E-21  |
| rs2912779  | C  | T | -0.2374 | 0.0063 | 1.79E-313 |
| rs2965183  | A  | G | 0.0445  | 0.0065 | 6.31E-12  |
| rs2992756  | C  | T | -0.0506 | 0.0063 | 1.60E-15  |
| rs332529   | A  | G | -0.0606 | 0.0089 | 9.02E-12  |
| rs34195518 | CT | C | 0.0611  | 0.0096 | 2.01E-10  |
| rs35383942 | T  | C | 0.101   | 0.0139 | 3.79E-13  |
| rs35910339 | G  | C | 0.0462  | 0.0067 | 5.41E-12  |
| rs35961416 | CA | C | -0.0417 | 0.0066 | 2.71E-10  |
| rs3769821  | T  | C | -0.0565 | 0.0065 | 3.97E-18  |
| rs3821902  | G  | T | 0.0623  | 0.0089 | 2.99E-12  |
| rs3903072  | T  | G | -0.0434 | 0.0062 | 2.25E-12  |
| rs4081859  | A  | G | 0.0521  | 0.0073 | 7.08E-13  |
| rs418053   | C  | G | -0.0465 | 0.0063 | 1.20E-13  |
| rs4233486  | T  | C | 0.0396  | 0.0069 | 9.09E-09  |
| rs4286946  | G  | C | -0.0799 | 0.0083 | 8.63E-22  |
| rs4442975  | T  | G | -0.1274 | 0.0061 | 1.14E-95  |
| rs4496150  | A  | C | -0.0416 | 0.0072 | 8.09E-09  |
| rs4562056  | T  | G | 0.0416  | 0.0067 | 4.72E-10  |
| rs4702131  | C  | T | -0.0424 | 0.0062 | 1.00E-11  |
| rs4784227  | T  | C | 0.2153  | 0.0071 | 6.78E-201 |
| rs4820318  | A  | G | -0.0475 | 0.0064 | 1.03E-13  |
| rs4848599  | C  | T | 0.0933  | 0.01   | 1.59E-20  |
| rs4971059  | A  | G | 0.0424  | 0.0064 | 4.83E-11  |
| rs527616   | G  | C | 0.0499  | 0.0064 | 6.70E-15  |
| rs532436   | A  | G | 0.0431  | 0.0078 | 2.91E-08  |
| rs56013747 | C  | A | -0.0497 | 0.009  | 3.74E-08  |
| rs56387622 | C  | T | -0.0942 | 0.0106 | 5.47E-19  |

|            |     |   |         |        |          |
|------------|-----|---|---------|--------|----------|
| rs56891541 | TCC | T | 0.0535  | 0.0072 | 8.99E-14 |
| rs56971155 | T   | C | -0.0424 | 0.0064 | 3.63E-11 |
| rs57212245 | A   | G | -0.0652 | 0.0119 | 4.09E-08 |
| rs58058861 | A   | G | 0.0474  | 0.0074 | 1.91E-10 |
| rs5995875  | T   | C | 0.1206  | 0.0098 | 9.04E-35 |
| rs5997389  | A   | G | 0.0791  | 0.0108 | 2.19E-13 |
| rs60954078 | G   | A | 0.1817  | 0.0117 | 2.84E-54 |
| rs6122906  | G   | A | 0.0507  | 0.008  | 2.45E-10 |
| rs62048402 | A   | G | -0.0624 | 0.0063 | 3.50E-23 |
| rs62237573 | T   | C | 0.4256  | 0.034  | 6.87E-36 |
| rs62331150 | T   | G | 0.0494  | 0.0074 | 1.85E-11 |
| rs62355901 | C   | T | 0.1734  | 0.0082 | 3.42E-98 |
| rs62485509 | T   | G | -0.0545 | 0.0079 | 4.45E-12 |
| rs630965   | T   | C | 0.0992  | 0.0064 | 3.21E-54 |
| rs6472903  | T   | G | 0.0778  | 0.0083 | 4.43E-21 |
| rs6562760  | G   | A | 0.0443  | 0.0073 | 1.49E-09 |
| rs6569648  | T   | C | 0.0512  | 0.0073 | 2.98E-12 |
| rs6596100  | T   | C | -0.0439 | 0.0076 | 7.74E-09 |
| rs6597981  | G   | A | 0.0439  | 0.0062 | 1.35E-12 |
| rs66572733 | G   | C | 0.095   | 0.0162 | 4.74E-09 |
| rs67087079 | A   | G | 0.0527  | 0.0093 | 1.32E-08 |
| rs6725517  | G   | A | -0.0468 | 0.0067 | 2.93E-12 |
| rs6787391  | T   | C | 0.0567  | 0.0064 | 9.07E-19 |
| rs68056147 | A   | G | 0.0501  | 0.0069 | 5.36E-13 |
| rs6815814  | C   | A | 0.052   | 0.0072 | 6.13E-13 |
| rs6882649  | T   | G | 0.0388  | 0.0066 | 3.67E-09 |
| rs7072776  | G   | A | -0.0618 | 0.0068 | 1.75E-19 |
| rs7149262  | A   | C | -0.0724 | 0.0076 | 2.47E-21 |
| rs71557345 | A   | G | -0.0806 | 0.0129 | 3.87E-10 |
| rs71559437 | A   | G | -0.0686 | 0.0099 | 5.05E-12 |
| rs7223535  | A   | G | -0.0439 | 0.007  | 3.53E-10 |
| rs7258465  | C   | T | -0.0725 | 0.0066 | 2.79E-28 |
| rs72658071 | T   | A | 0.1182  | 0.0107 | 2.58E-28 |
| rs72725173 | A   | G | 0.0559  | 0.0085 | 3.88E-11 |
| rs72755295 | G   | A | 0.1376  | 0.0179 | 1.65E-14 |
| rs73949122 | G   | C | -0.0593 | 0.0084 | 1.85E-12 |
| rs7500067  | G   | A | 0.0785  | 0.0073 | 4.06E-27 |
| rs7626742  | T   | G | 0.1046  | 0.0062 | 1.61E-63 |
| rs7650602  | C   | T | 0.0489  | 0.0063 | 6.22E-15 |
| rs76956704 | T   | C | 0.1352  | 0.0182 | 1.27E-13 |
| rs7697216  | C   | T | 0.1039  | 0.0098 | 1.61E-26 |
| rs77528541 | T   | G | -0.0583 | 0.0096 | 1.41E-09 |
| rs77554484 | A   | C | -0.0741 | 0.0093 | 1.28E-15 |
| rs78381082 | G   | A | -0.0611 | 0.0089 | 5.43E-12 |

|            |   |   |         |        |           |
|------------|---|---|---------|--------|-----------|
| rs78425380 | C | T | 0.0603  | 0.0099 | 1.03E-09  |
| rs78440108 | T | C | -0.0595 | 0.0084 | 1.62E-12  |
| rs78540526 | T | C | 0.2758  | 0.0113 | 1.81E-131 |
| rs7904249  | A | G | 0.0764  | 0.0084 | 6.98E-20  |
| rs7971     | G | A | -0.0365 | 0.0065 | 1.93E-08  |
| rs8082452  | G | T | -0.0418 | 0.0065 | 1.14E-10  |
| rs9284657  | G | C | 0.0366  | 0.0062 | 3.36E-09  |
| rs9361840  | G | A | 0.0541  | 0.0072 | 7.14E-14  |
| rs9693444  | C | A | -0.0626 | 0.0066 | 1.60E-21  |
| rs9833888  | T | G | 0.0457  | 0.0074 | 5.15E-10  |
| rs9952980  | C | T | -0.0478 | 0.0065 | 1.65E-13  |
| rs9954058  | C | G | -0.0891 | 0.0122 | 2.79E-13  |

---
